# Supplementary material
Source: publisher figshare collection journal article supplement (https://frontiersin.figshare.com/ndownloader/files/34351484)

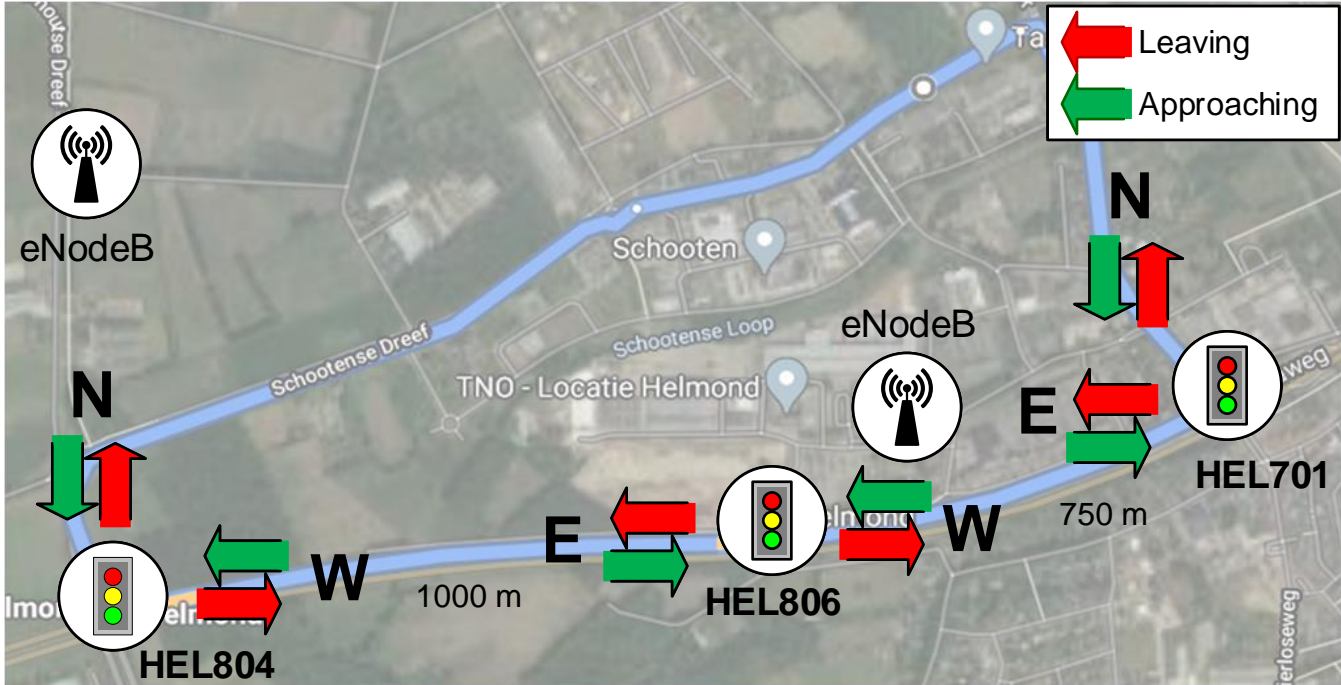

Supplement: Supplementary file 1 [file 34351484]

a)

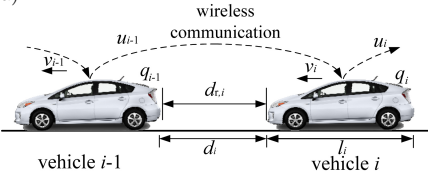

b)

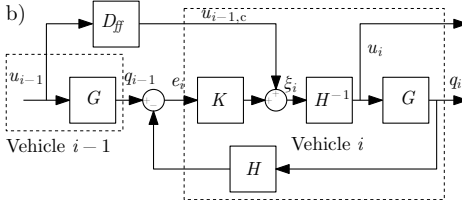

c)

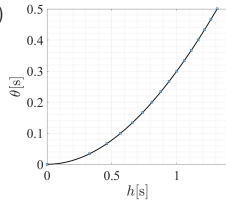

Supplement: Supplementary file 2 [file 34351484]

# ① IEEE802.11p (ITS-G5)

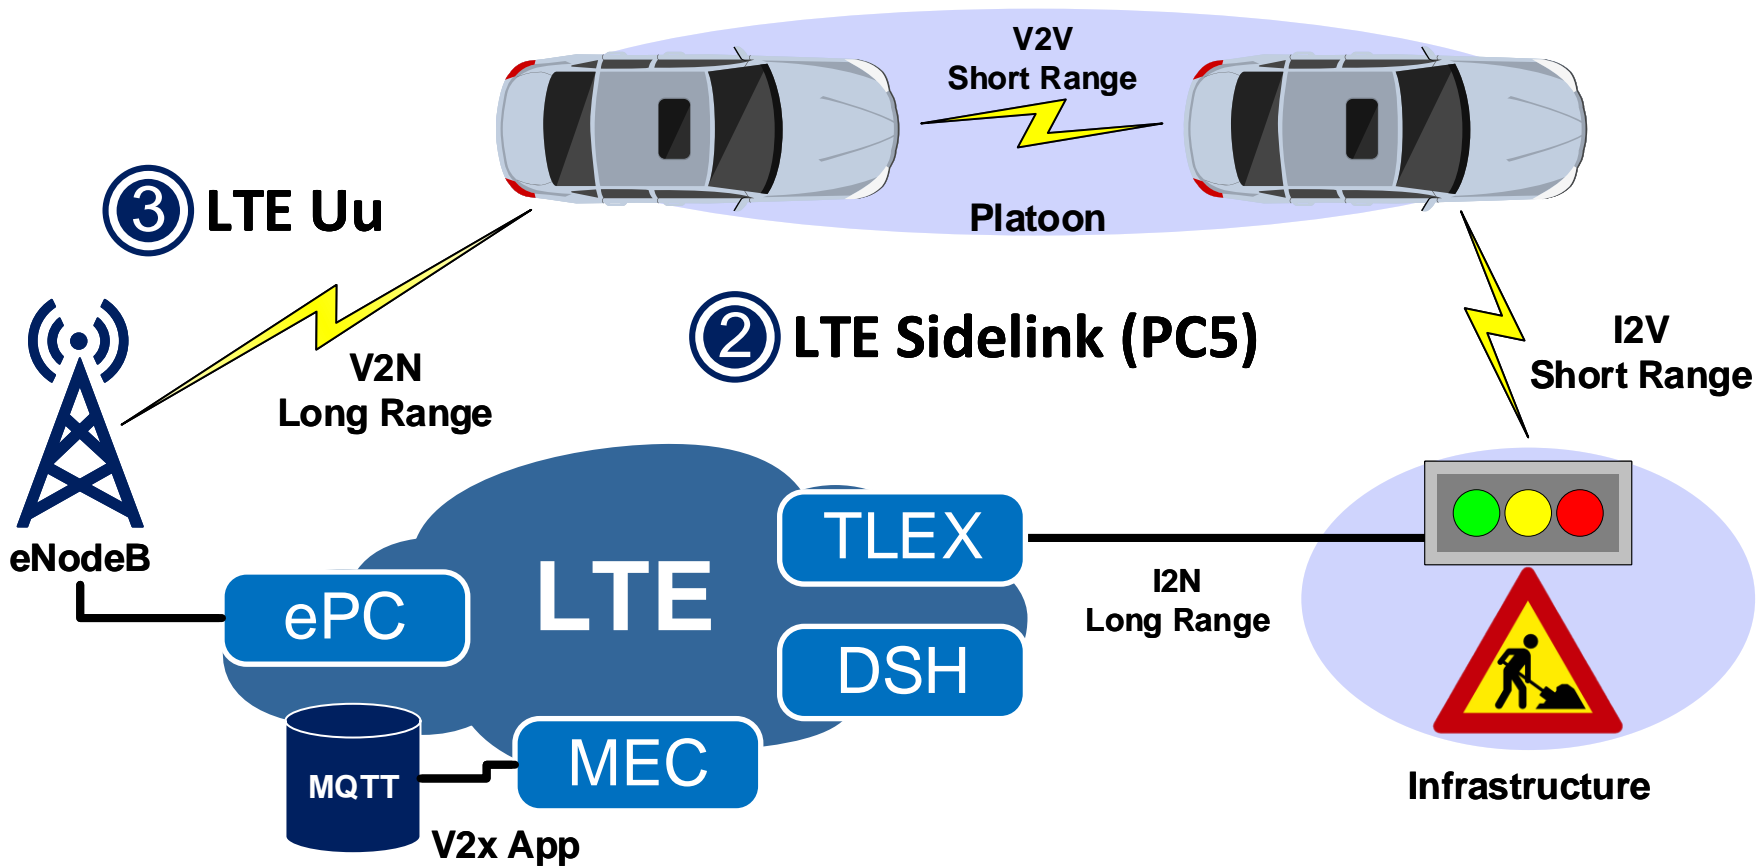

Supplement: Supplementary file 3 [file 34351484]

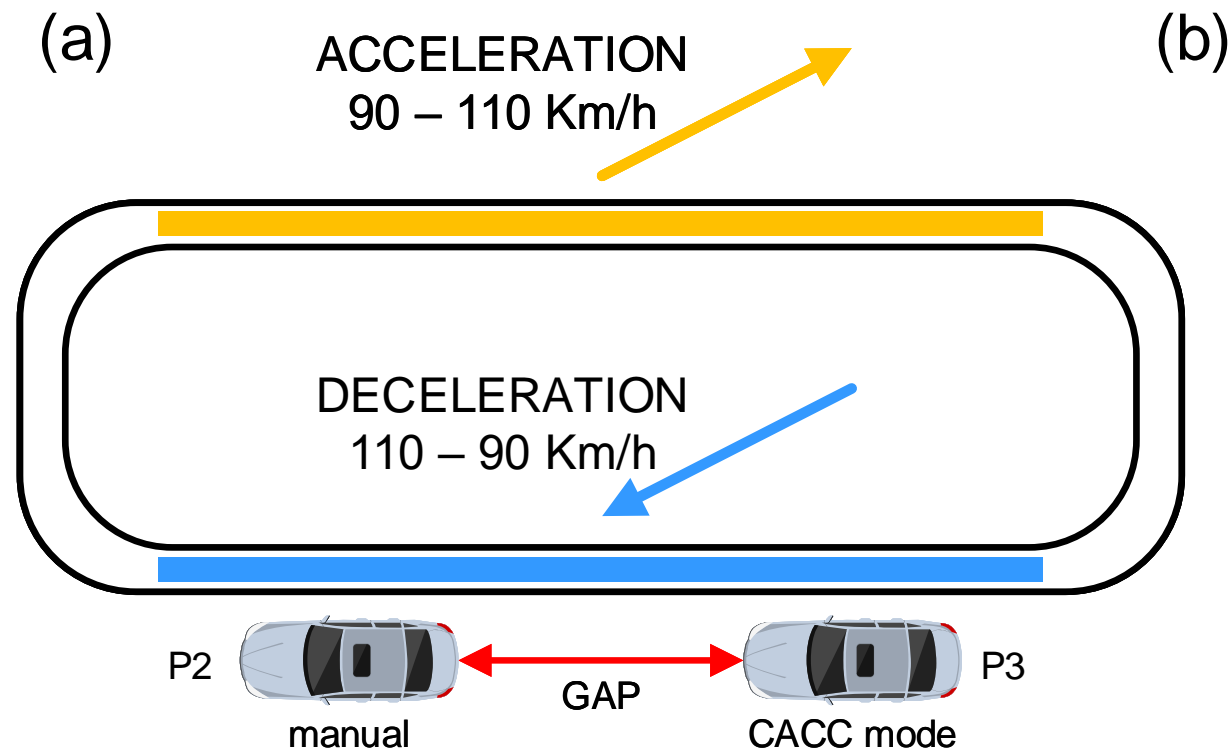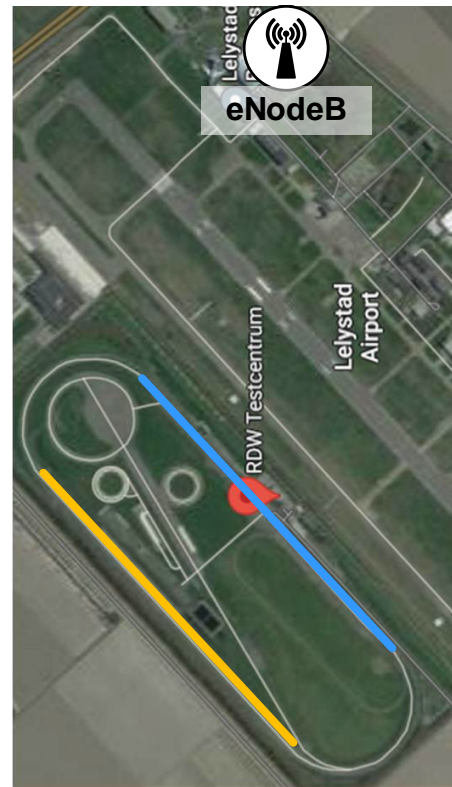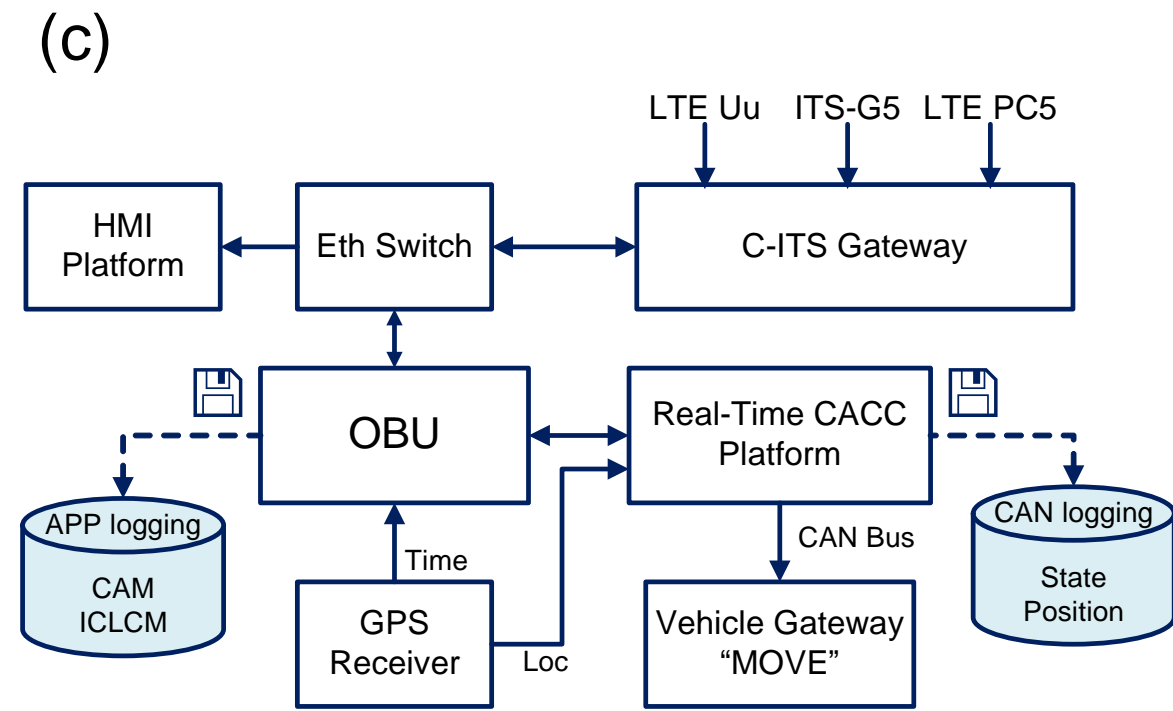

Supplement: Supplementary file 4 [file 34351484]

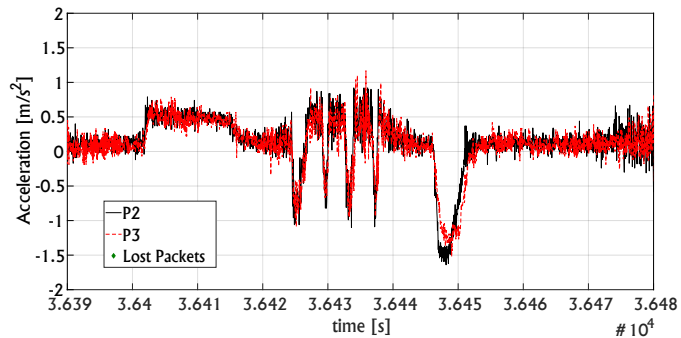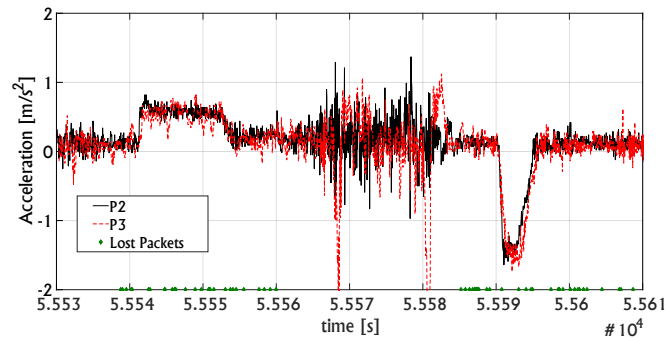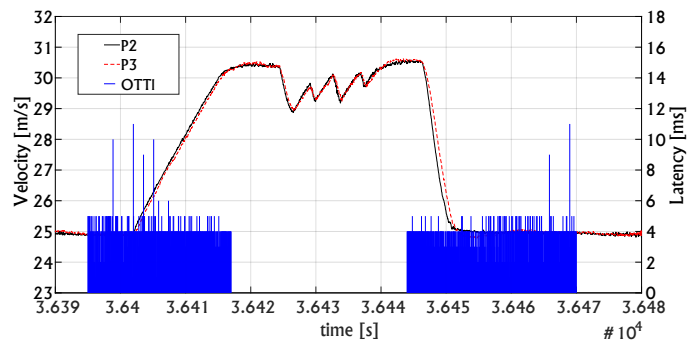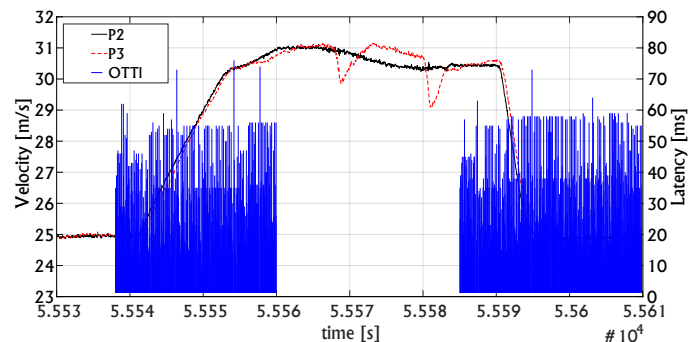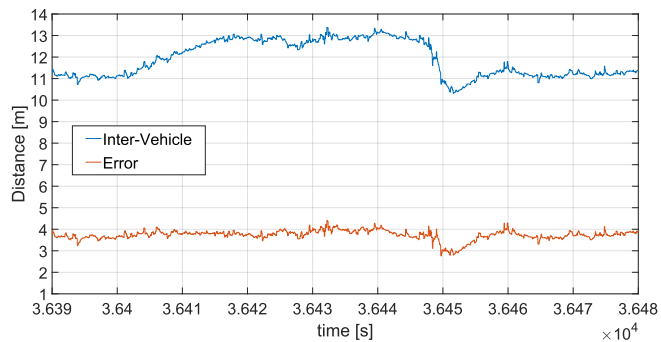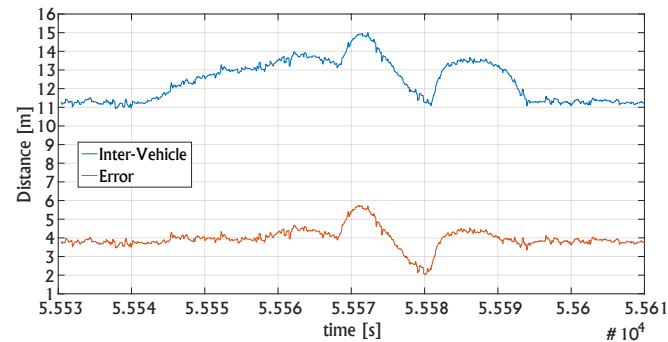

Supplement: Supplementary file 5 [file 34351484]

## ITS-G5

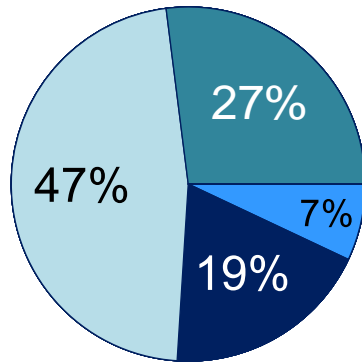

Messages

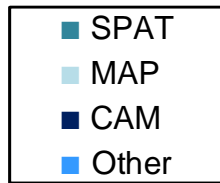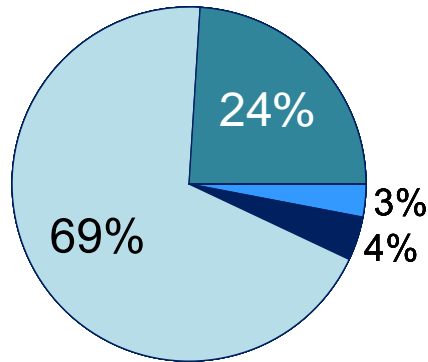

Bytes

## LTE Uu

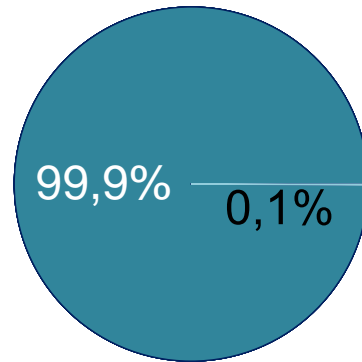

Messages

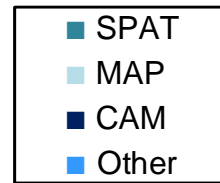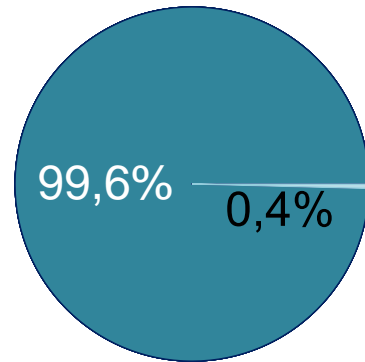

Bytes

Supplement: Supplementary file 6 [file 34351484]

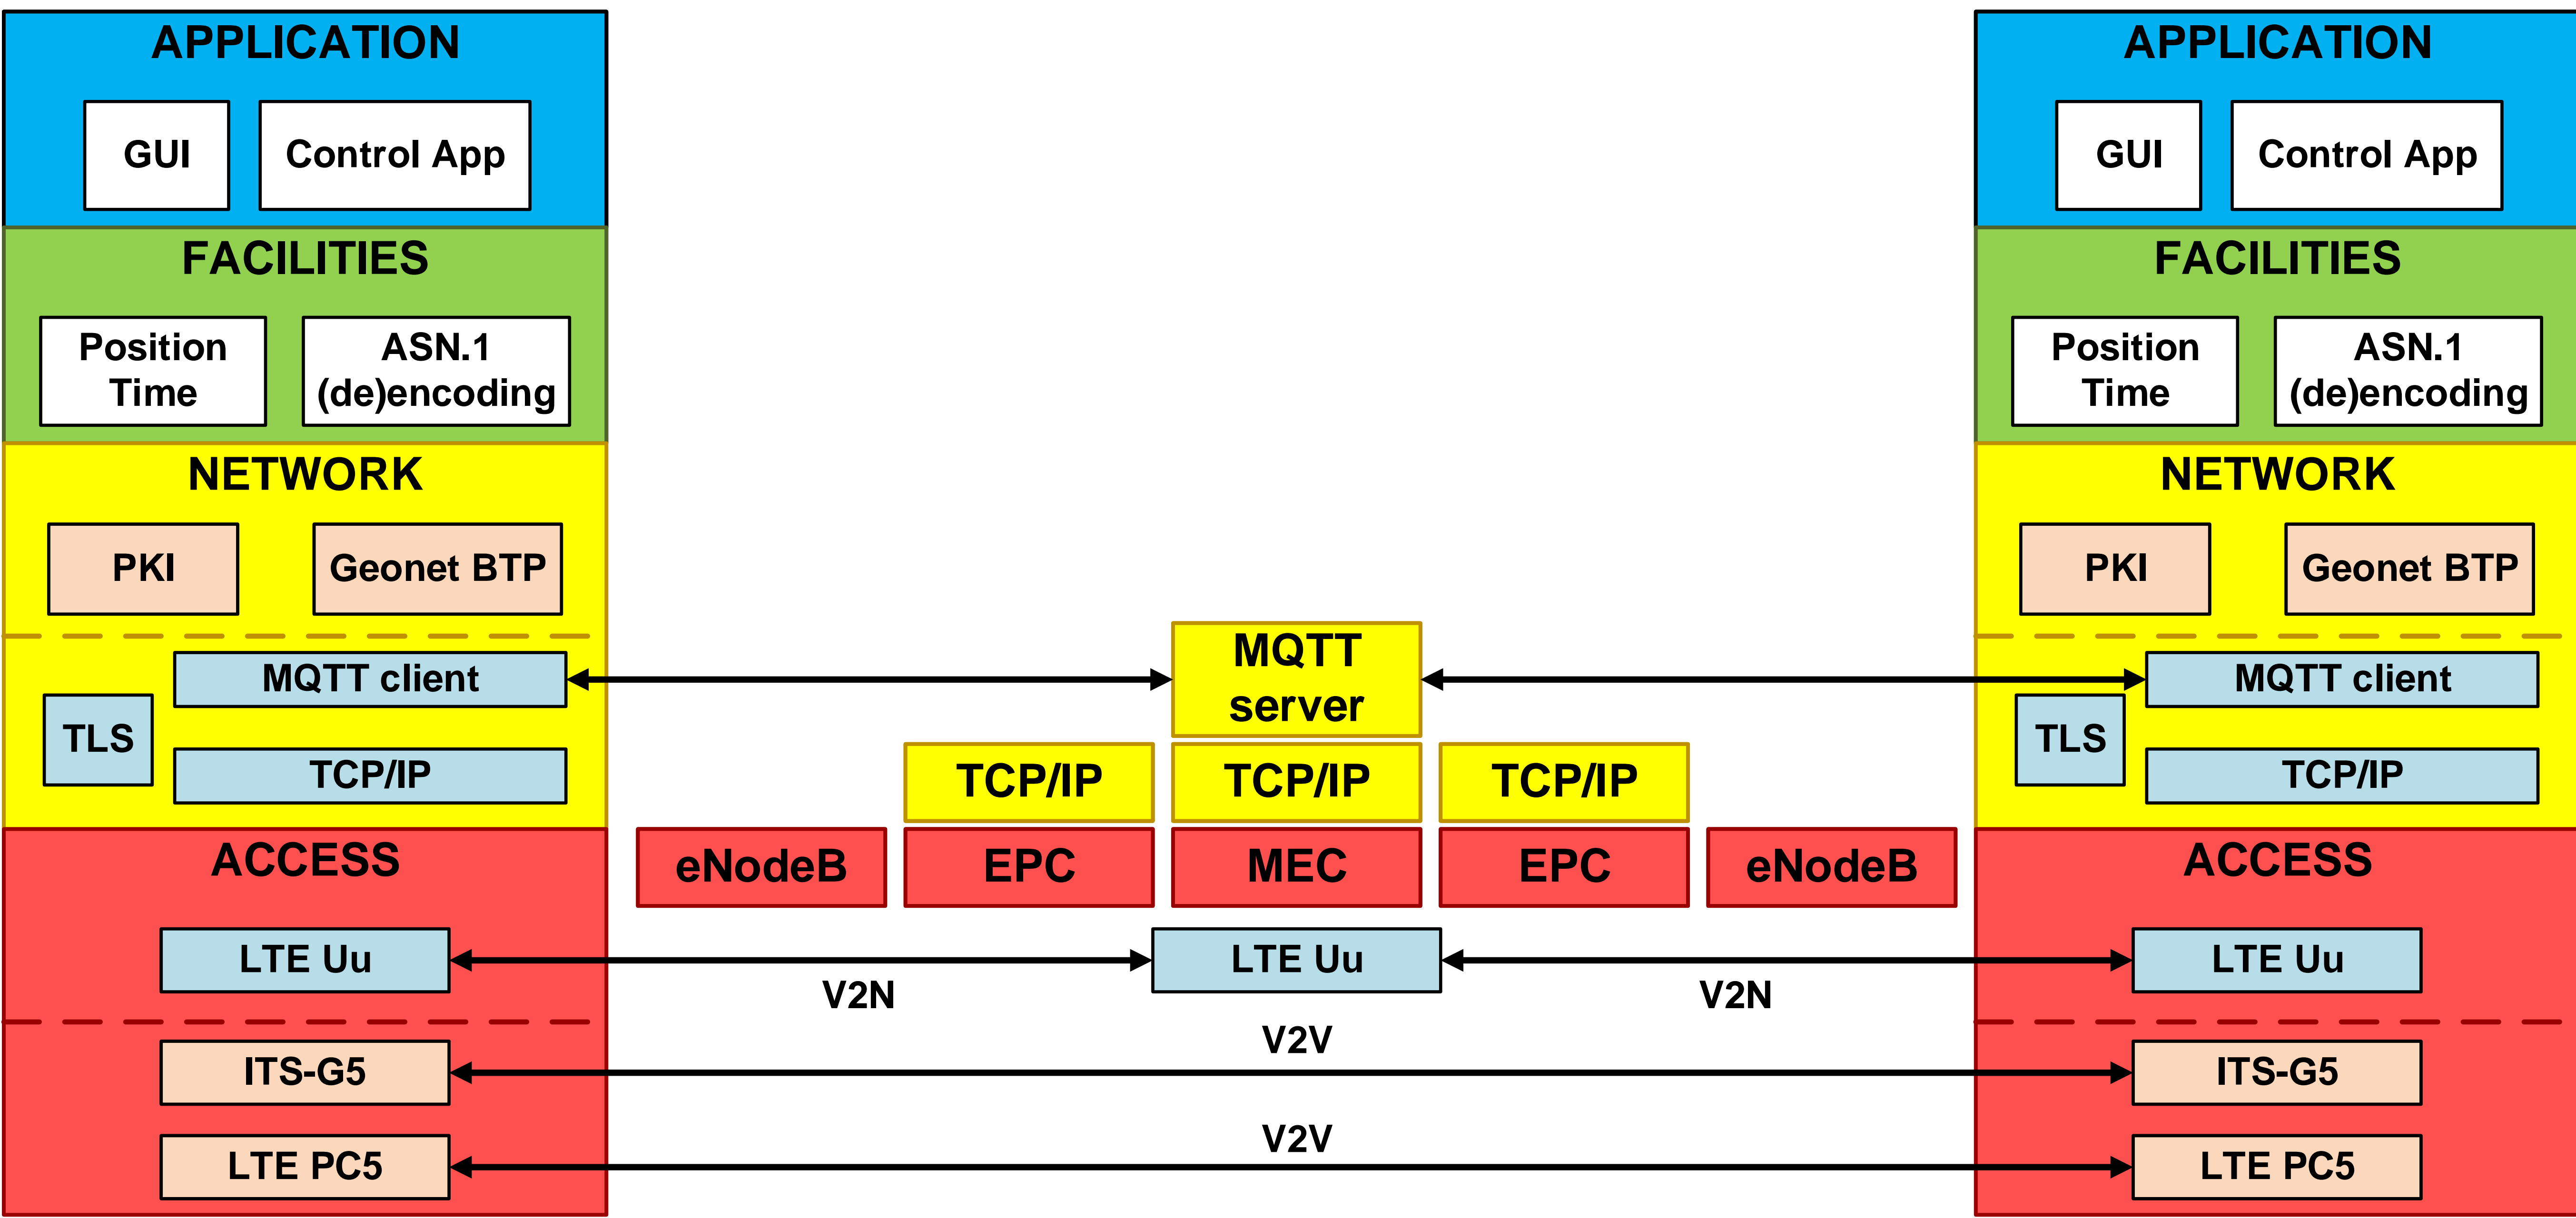

Supplement: Supplementary file 7 [file 34351484]

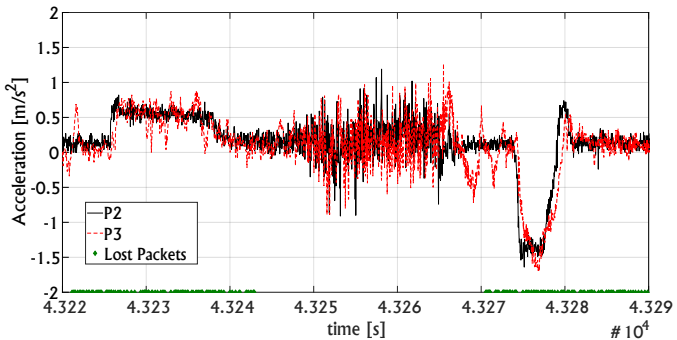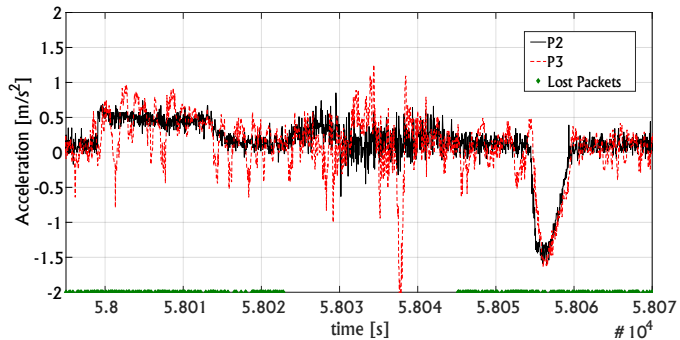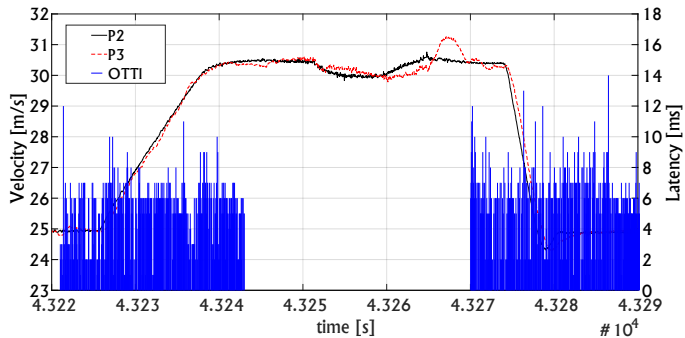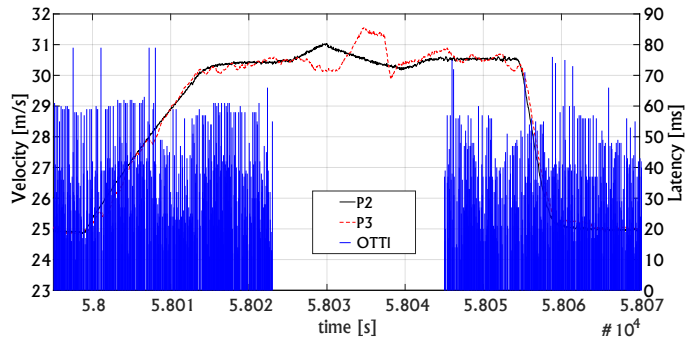

Supplement: Supplementary file 8 [file 34351484]

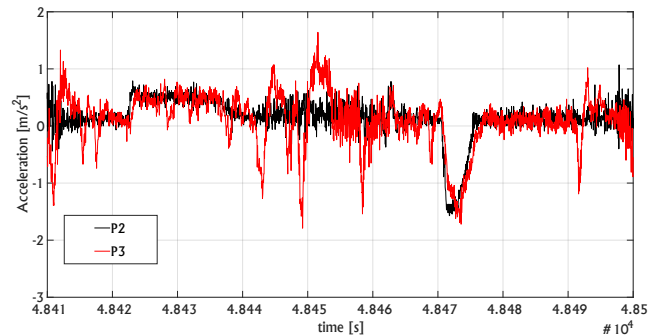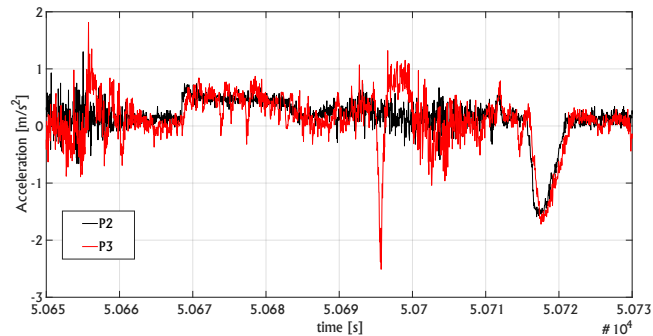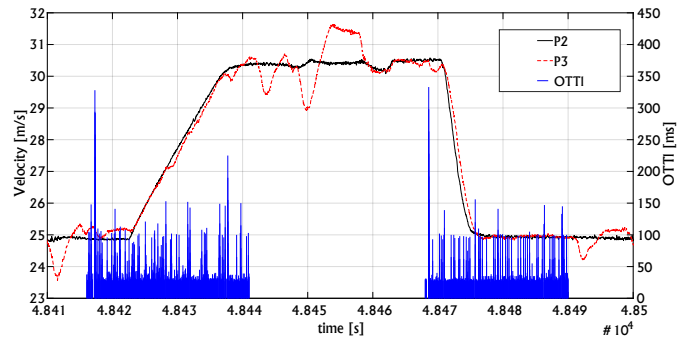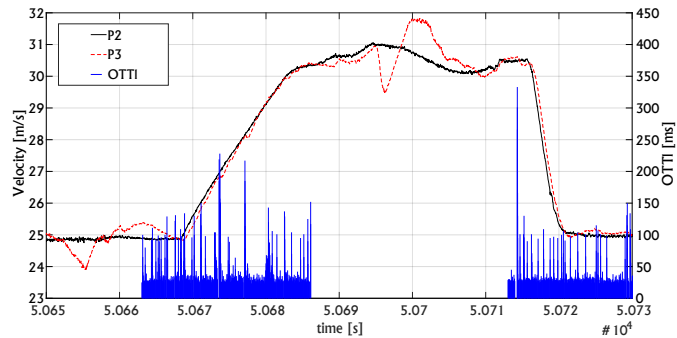

Supplement: Supplementary file 9 [file 34351484]

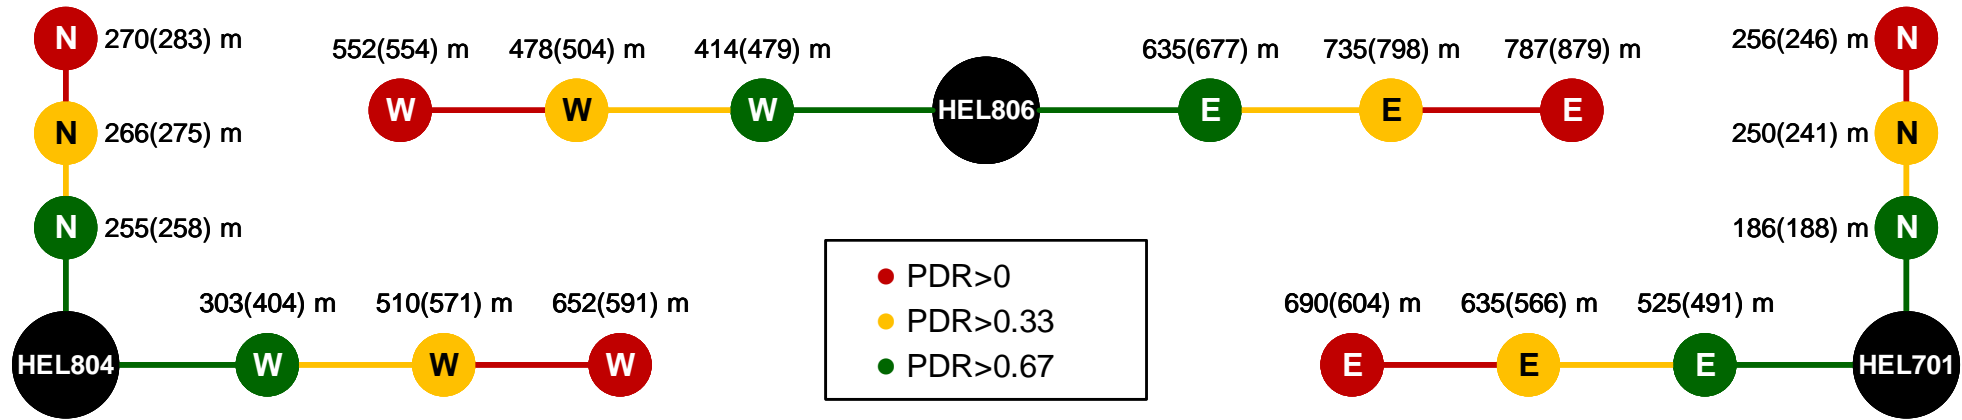

Supplement: Supplementary file 10 [file 34351484]

(a)

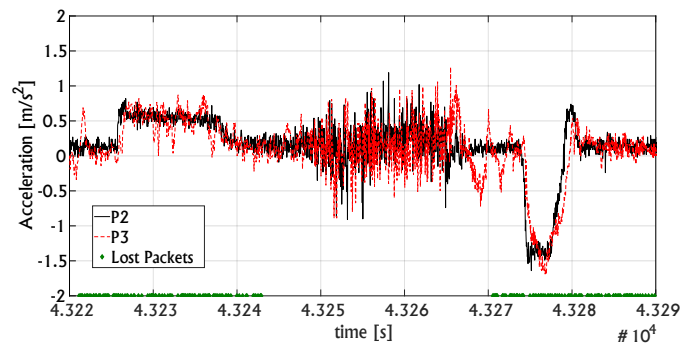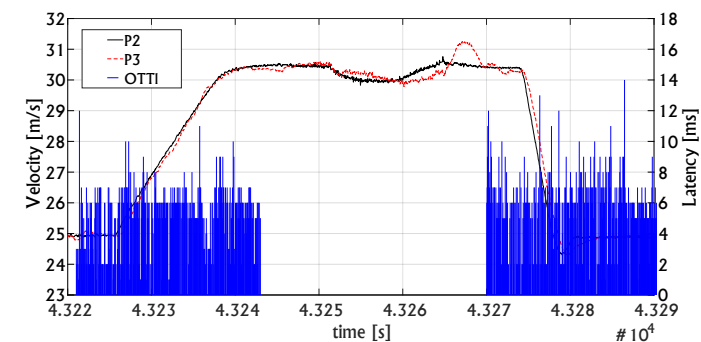

(b)

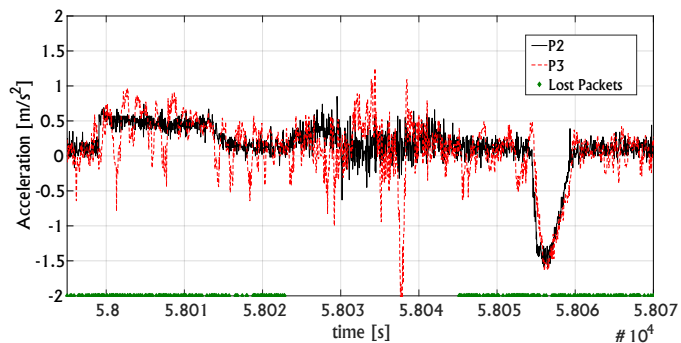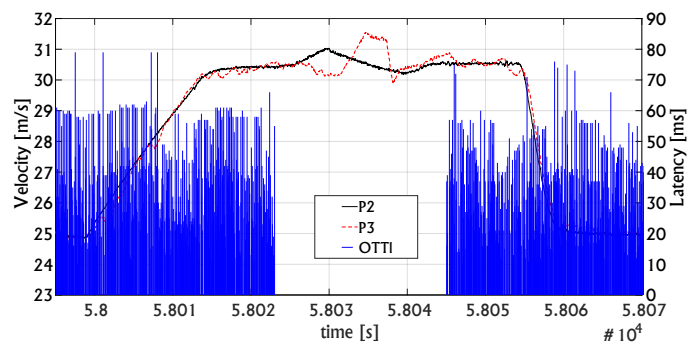

(c)

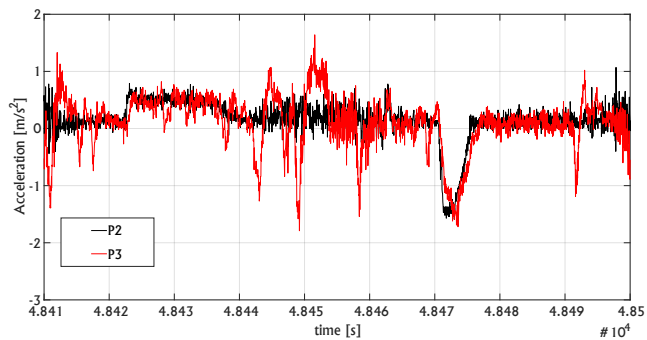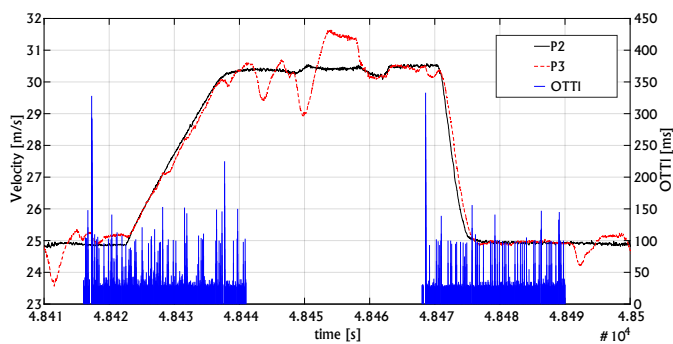

(d)

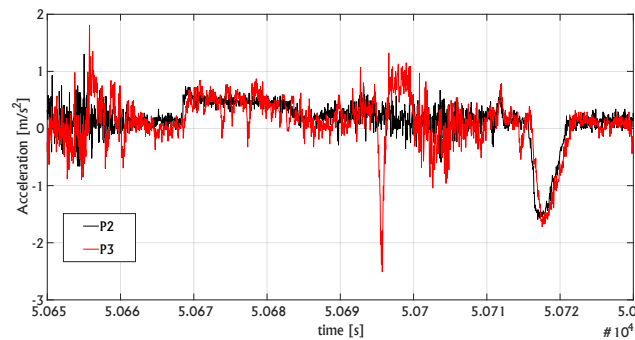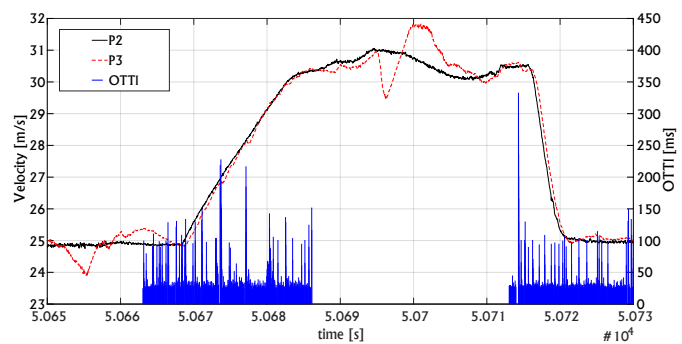

Supplement: Supplementary file 11 [file 34351484]

## ITS-G5

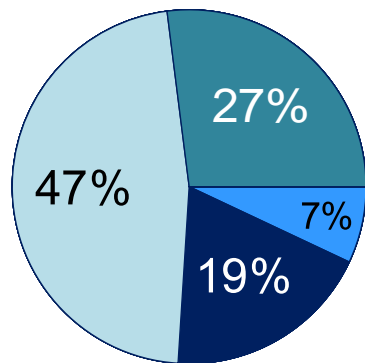

Messages

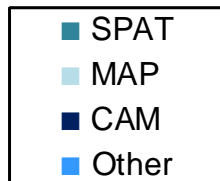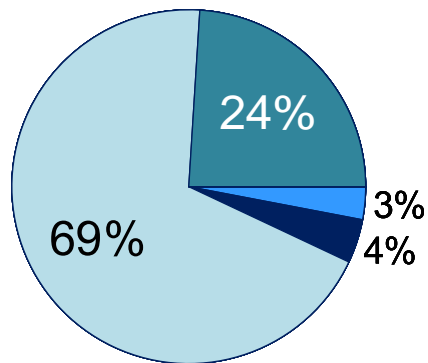

Bytes

## LTE Uu

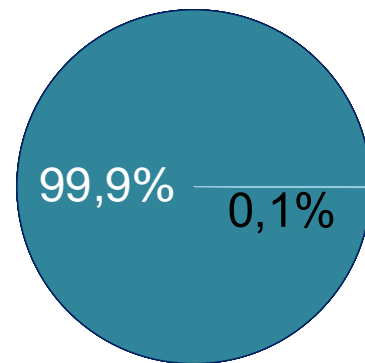

Messages

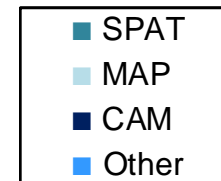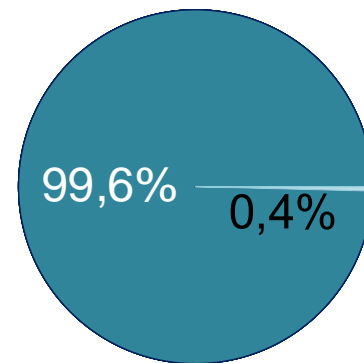

Bytes

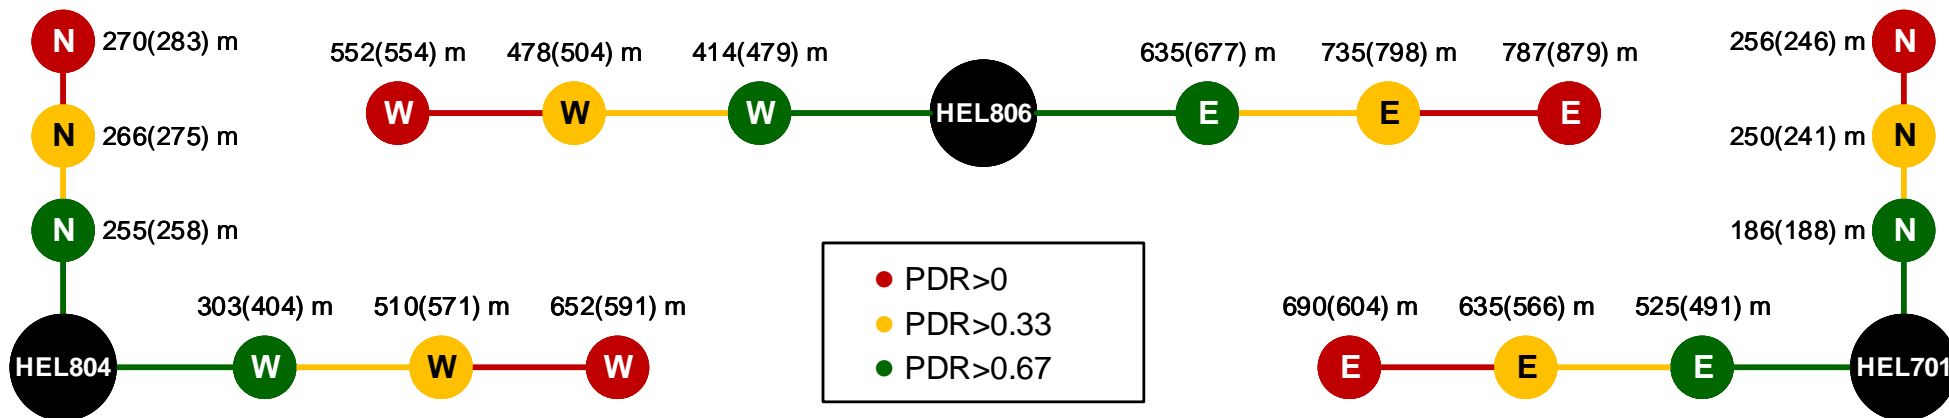

Supplement: Supplementary file 12 [file 34351484]

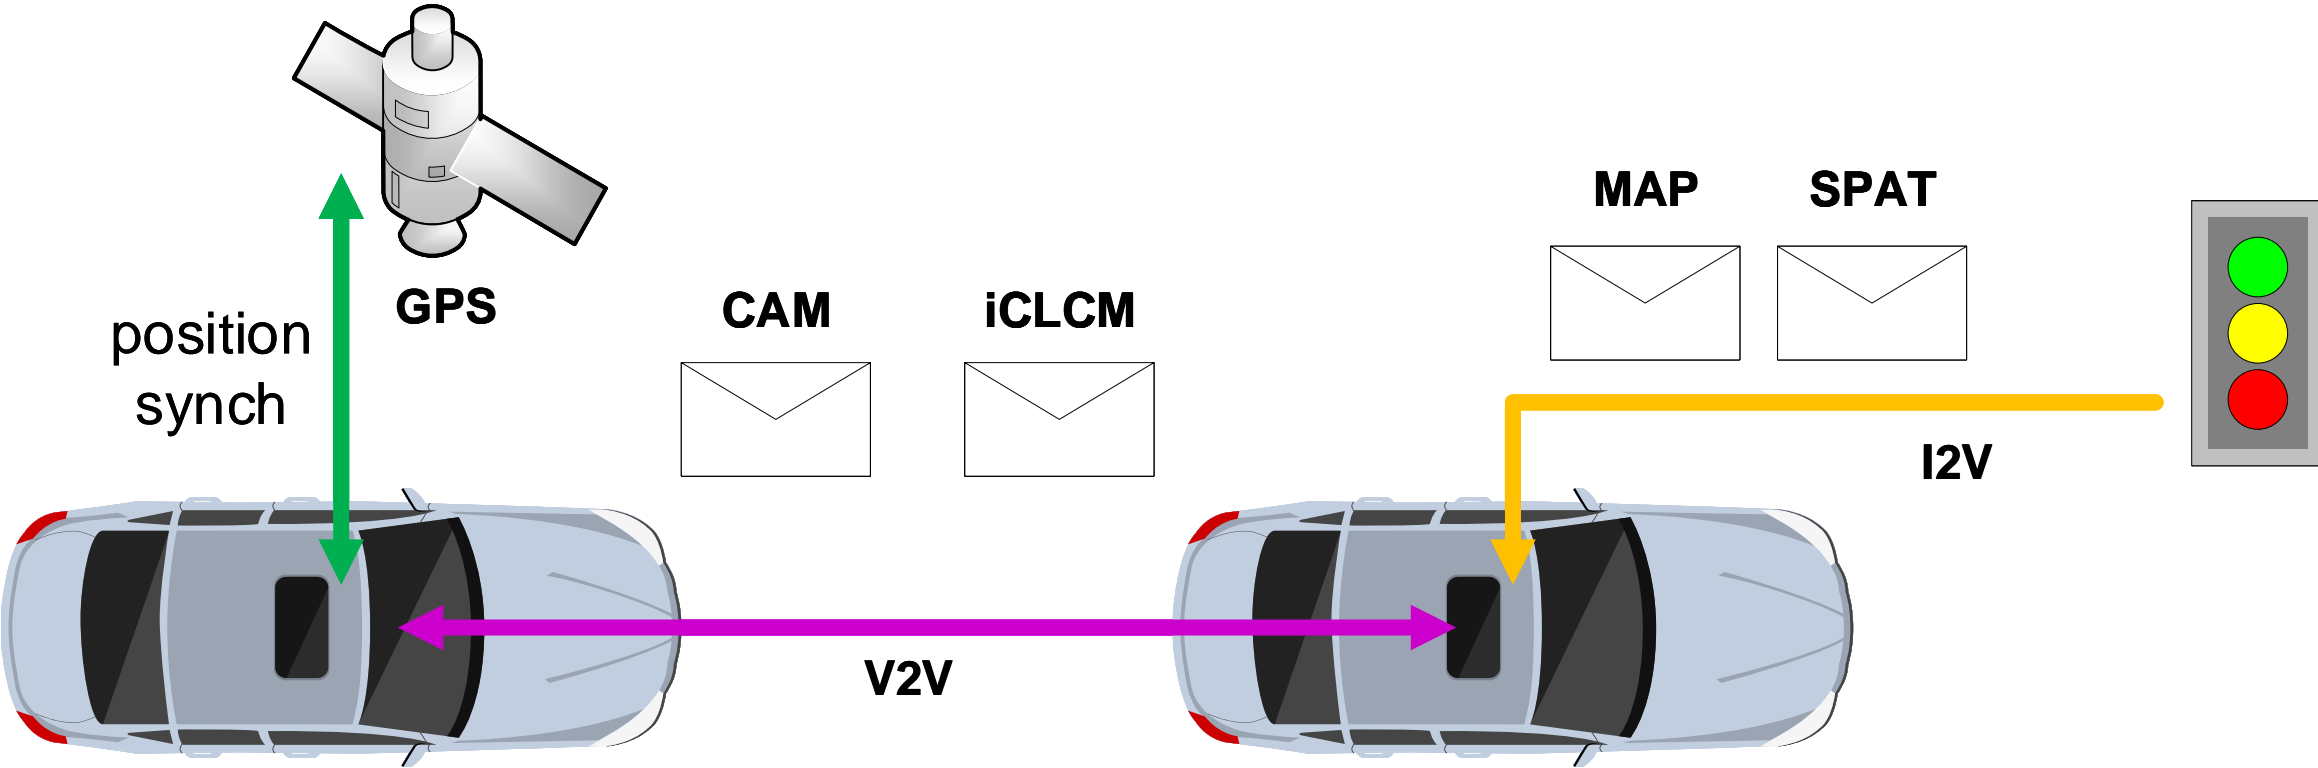

Supplement: Supplementary file 13 [file 34351484]
